# Supplementary material for: Improving Patient Outcomes While Reducing Empirical Treatment with Multiplex-Polymerase-Chain-Reaction/Pooled-Antibiotic-Susceptibility-Testing Assay for Complicated and Recurrent Urinary Tract Infections
Source: MDPI journal article supplement (doi:10.3390/diagnostics13193060), 2023-09-26
Supplement: s1 [file s1]

### Supplemental Materials

| Study Item or Activity                                        | Screening: Day 1 | Index Visit: Day 1 | Follow Up: Days 2-14 | Follow Up: 30 Days | Comments                                                                                                                                                                                                                                                                                                                                                                                                                                                                                                                                                                                                                                                                                                                                                                                                                                                                                                                                                                              | Completed By:                                                      |
|---------------------------------------------------------------|------------------|--------------------|----------------------|--------------------|---------------------------------------------------------------------------------------------------------------------------------------------------------------------------------------------------------------------------------------------------------------------------------------------------------------------------------------------------------------------------------------------------------------------------------------------------------------------------------------------------------------------------------------------------------------------------------------------------------------------------------------------------------------------------------------------------------------------------------------------------------------------------------------------------------------------------------------------------------------------------------------------------------------------------------------------------------------------------------------|--------------------------------------------------------------------|
| Inclusion / Exclusion Criteria Check<br>&<br>Informed Consent | X                |                    |                      |                    | Full inclusion and exclusion criteria are described in Supplemental Table S2.<br><br>The study obtained Western IRB approval (20214705) and was conducted in accordance with the Declaration of Helsinki. The IRB determined that the study protocol met the requirements for a partial waiver of authorization and only verbal patient informed consent was needed. All subjects provided verbal informed consent prior to enrollment.                                                                                                                                                                                                                                                                                                                                                                                                                                                                                                                                               | Participants, Participating Investigator(s) & Research Coordinator |
| Urine Sample Collection                                       |                  | X                  |                      |                    | Urine collection methods included midstream voided clean-catch or catheterization using a sterile technique. There were no significant differences in rates of each collection method between test arms (supplemental table S3).                                                                                                                                                                                                                                                                                                                                                                                                                                                                                                                                                                                                                                                                                                                                                      | Participants                                                       |
| Arm Assignment                                                |                  | X                  |                      |                    | Each subject's assignment to one of the urine test arms was ordered at the discretion of the treating clinician.                                                                                                                                                                                                                                                                                                                                                                                                                                                                                                                                                                                                                                                                                                                                                                                                                                                                      | Participating Investigator(s)                                      |
| Urine Sample Delivery to Lab                                  |                  | X                  |                      |                    | Lab receives urine samples within 48 hours of collection time                                                                                                                                                                                                                                                                                                                                                                                                                                                                                                                                                                                                                                                                                                                                                                                                                                                                                                                         | Research Coordinator & Courier                                     |
| Patient Baseline Survey                                       |                  | X                  |                      |                    | The baseline survey included questions evaluating baseline symptom severity and treatment information. The symptom portion of the survey used a validated American English Acute Cystitis Symptom Score (ACSS) Questionnaire, asking patients to evaluate the severity of typical UTI symptoms. The ACSS Questionnaire is validated using 5 different criteria to define the presence of UTI symptoms. Two of those criteria use subsets of symptoms defined by regulatory bodies: the European Medicines Agency (EMA) and the Food and Drug Administration (FDA). For this US-based study, the criterion based on the 4 UTI symptoms defined by the FDA Guidance for uncomplicated UTI (urinary frequency, urinary urgency, dysuria, and suprapubic pain) was chosen. The severity of each of the symptoms were scored from 0 to 3: no (0), mild (1), moderate (2), and severe (3). Only patients with at least one of the 4 FDA symptoms at baseline were included in the analyses. | Participants                                                       |
| Demographics and Medical History Form                         |                  | X                  |                      |                    | See also the Treatment Decision Survey and the Patient Daily Survey sections below...                                                                                                                                                                                                                                                                                                                                                                                                                                                                                                                                                                                                                                                                                                                                                                                                                                                                                                 | Participating Investigator(s) & Research Coordinator               |

|                                                   |  |   |   |   |                                                                                                                                                                                                                                                                                                                                                                                                                                                                                                                                                                                                                                                                                                                                                                                                                                                                                                                                                                                                                                                                                                                                                                                                                                                                                                                                                                                                                                               |                                                             |
|---------------------------------------------------|--|---|---|---|-----------------------------------------------------------------------------------------------------------------------------------------------------------------------------------------------------------------------------------------------------------------------------------------------------------------------------------------------------------------------------------------------------------------------------------------------------------------------------------------------------------------------------------------------------------------------------------------------------------------------------------------------------------------------------------------------------------------------------------------------------------------------------------------------------------------------------------------------------------------------------------------------------------------------------------------------------------------------------------------------------------------------------------------------------------------------------------------------------------------------------------------------------------------------------------------------------------------------------------------------------------------------------------------------------------------------------------------------------------------------------------------------------------------------------------------------|-------------------------------------------------------------|
| Laboratory Processing and Testing of Urine Sample |  |   | X |   | <p>Dipstick urinalysis may be ordered and performed separately by the healthcare provider.</p> <p>Microbial identification and quantitation/antibiotic sensitivity results are delivered within 3-5 days for SUC or 24 hours for M-PCR/P-AST (after receipt by the lab).</p>                                                                                                                                                                                                                                                                                                                                                                                                                                                                                                                                                                                                                                                                                                                                                                                                                                                                                                                                                                                                                                                                                                                                                                  | Study Site Clinical Laboratories and Pathnostics Laboratory |
| Patient Daily Survey                              |  |   | X |   | The Patient Daily Survey also included treatment information as reported by the participant.                                                                                                                                                                                                                                                                                                                                                                                                                                                                                                                                                                                                                                                                                                                                                                                                                                                                                                                                                                                                                                                                                                                                                                                                                                                                                                                                                  | Participants                                                |
| Treatment Decision Survey                         |  | X | X |   | <p>“Treated” was defined as treated with antimicrobial agents, including antibiotic and anti-fungal drugs, between day 1 and day 14. Study subjects who did not receive any medication, or who only received medication other than antimicrobial agents, were defined as “Untreated”.</p> <p>For the treated subjects, if the healthcare provider indicated the use of empirical treatment via the responses on the Demographics and Medical History Form and the Treatment Decision Survey, the subjects were categorized as “empirically treated”. If the healthcare provider did not indicate the use of empirical treatment, the subjects receiving antimicrobial agents were categorized as “directly treated” based upon the test result reviewed by the clinician, which was determined by study arm.</p>                                                                                                                                                                                                                                                                                                                                                                                                                                                                                                                                                                                                                              | Participating Investigator(s)                               |
| 30 Day Survey                                     |  |   |   | X | <p>Clinical outcomes evaluated in this analysis were based on patient’s responses to the clinical outcome questions on the day 30 follow-up survey. These questions included:</p> <ul style="list-style-type: none"> <li>• “Have you been diagnosed with another UTI? Yes or No”</li> <li>• “How many times have you gone back or seen another healthcare provider for UTI-related issues? 0, 1, 2, 3 or more”</li> <li>• “How many times have you been hospitalized due to UTI-related issues? 0, 1, 2, 3 or more”</li> <li>• “How many times have you visited the emergency department due to UTI-related issues? 0, 1, 2, 3 or more”</li> <li>• “How many times have you visited urgent care due to UTI-related issues? 0, 1, 2, 3 or more”.</li> </ul> <p>Based on patients’ responses to these questions, differences in the following three negative outcomes were measured:</p> <ol style="list-style-type: none"> <li>1. a new UTI diagnosis since the index visit</li> <li>2. a new visit to a medical provider for UTI symptoms</li> <li>3. a UTI-related hospitalization or visit to UC or the ER</li> </ol> <p>The composite negative outcome was defined as patients who had any one or more of these three negative outcomes. Each variable was analyzed separately, and the composite outcome was coded as a yes/no variable. The comparisons of each of the individual negative outcomes were also explored in the study.</p> | Participants                                                |

Supplemental Table S1. Study Activities

| Inclusion                                                                                                                                                                                                        | Exclusion                                                                                                                                                                                                                                                                                        |
|------------------------------------------------------------------------------------------------------------------------------------------------------------------------------------------------------------------|--------------------------------------------------------------------------------------------------------------------------------------------------------------------------------------------------------------------------------------------------------------------------------------------------|
| Able to provide Informed Consent in English or Spanish                                                                                                                                                           | Failure to meet inclusion criteria (including those unable to provide Informed Consent)                                                                                                                                                                                                          |
| Over 18 years of age                                                                                                                                                                                             | Inability to independently provide symptom data via an email-accessed online survey                                                                                                                                                                                                              |
| Male or Female (no predetermined quotas or ratios for participation)                                                                                                                                             | Special Populations: pregnant or incarcerated individuals                                                                                                                                                                                                                                        |
| Presenting to a urologist or urogynecologist in an outpatient setting with a history of cUTI and clinically suspected active UTI (e.g., symptomatic with urinalysis positive for leukocyte esterase or nitrites) | Complicating conditions: currently receiving radiotherapy; bladder/urologic cancer; chronic pelvic pain; untreated overactive bladder; antibiotic use (other than for UTI); chronic ( $\geq 10$ days) indwelling catheters; self-catheterization; or urinary diversion at the time of enrollment |
| Requires microbial testing according to clinician judgment                                                                                                                                                       | Clinician deems microbial testing unnecessary                                                                                                                                                                                                                                                    |

\*Definition of cUTI: UTI is considered complicated when the individual has one or more risk factors that predispose to higher treatment failure and poor outcomes. These poor outcomes include persistence of UTI, increasing severity, or occurrence of complications such as urosepsis, recurrence, and perinephric abscess.

Examples of cUTIs include:

UTIs in the elderly population due to increased chances of comorbidities and immune compromised state

Recurrent UTIs, which is defined as the occurrence of  $\geq 2$  symptomatic episodes within 6 months or  $\geq 3$  symptomatic episodes within 12 months

UTI in patients with anatomic or functional pathology affecting the urinary tract, such as an obstruction, hydro-nephrosis, renal tract calculi, or colovesical fistula

UTIs occurring due to an immune compromised state, such as steroid use, post chemotherapy, diabetes, and HIV

UTIs caused by atypical microorganisms or multi-drug resistant microorganisms. Typical UTI-causing microorganisms include *E. coli*, *P. aeruginosa*, several species within the Enterobacteriaceae family (*Proteus* and *Klebsiella*), and a few gram-positive bacteria, such as *Staphylococcus saprophyticus* and *Enterococcus faecalis*, as well as fungi, such as *Candida* sp75.

UTI in male: UTIs occurring despite the presence of anatomical protective measures as part of the male urinary tract anatomy are cUTI

UTI in patients with history of prior radiotherapy to the abdomen or pelvis

UTIs occurring after instrumentation, nephrostomy tubes, ureteric stents, suprapubic tubes or Foley catheters

UTI in patients with the history of recurrent UTI

UTIs in renal transplant patients

UTIs in patients with impaired renal function

UTIs following prostatectomies or radiotherapy

| All unmatched ( <i>N</i> = 577) |                               |                       |                 |
|---------------------------------|-------------------------------|-----------------------|-----------------|
|                                 | M-PCR/P-AST ( <i>n</i> = 429) | SUC ( <i>n</i> = 148) | <i>p</i> -value |
|                                 |                               |                       | 0.21            |
| Voided                          | 425 (99.1%)                   | 144 (97.3%)           |                 |
| Catheter-Collected              | 4 (0.9%)                      | 4 (2.7%)              |                 |
| All matched                     |                               |                       |                 |
|                                 | M-PCR/P-AST ( <i>n</i> = 252) | SUC ( <i>n</i> = 146) | <i>p</i> -value |
|                                 |                               |                       | 0.47            |
| Voided                          | 248 (98.4%)                   | 142 (97.3%)           |                 |
| Catheter-Collected              | 4 (1.6%)                      | 4 (2.7%)              |                 |
| ≥60 unmatched                   |                               |                       |                 |
|                                 | M-PCR/P-AST ( <i>n</i> = 325) | SUC ( <i>n</i> = 91)  | <i>p</i> -value |
|                                 |                               |                       | 1.00            |
| Voided                          | 322 (99.1%)                   | 90 (98.9%)            |                 |
| Catheter-Collected              | 3 (0.9%)                      | 1 (1.1%)              |                 |
| ≥60 matched                     |                               |                       |                 |
|                                 | M-PCR/P-AST ( <i>n</i> = 167) | SUC ( <i>n</i> = 91)  | <i>p</i> -value |
|                                 |                               |                       | 1.00            |
| Voided                          | 164 (98.2%)                   | 90 (98.9%)            |                 |
| Catheter-Collected              | 3 (1.8%)                      | 1 (1.1%)              |                 |

Supplemental Table S3. Urine Specimen Collection Methods

| Microorganism                                                                                                                                                                                                    | Bacterial Cell Wall<br>(gram-negative <sup>a</sup> or gram-positive <sup>a</sup> ) | Growth<br>(fastidious <sup>b</sup> or non-fastidious <sup>b</sup> ) | Classification<br>(classical <sup>c</sup> or emerging <sup>c</sup> ) |
|------------------------------------------------------------------------------------------------------------------------------------------------------------------------------------------------------------------|------------------------------------------------------------------------------------|---------------------------------------------------------------------|----------------------------------------------------------------------|
| <i>Acinetobacter</i>                                                                                                                                                                                             | gram-negative                                                                      | Non-fastidious                                                      | emerging                                                             |
| <i>Actinotignum schaalii</i>                                                                                                                                                                                     | gram-positive                                                                      | fastidious                                                          | emerging                                                             |
| <i>Aerococcus urinae</i>                                                                                                                                                                                         | gram-positive                                                                      | fastidious                                                          | emerging                                                             |
| <i>Alloscardovia</i>                                                                                                                                                                                             | gram-positive                                                                      | fastidious                                                          | emerging                                                             |
| <i>Candida albicans</i>                                                                                                                                                                                          | NA - yeast                                                                         | NA - yeast                                                          | classical                                                            |
| <i>Candida auris</i>                                                                                                                                                                                             | NA - yeast                                                                         | NA - yeast                                                          | classical                                                            |
| <i>Candida glabrata</i>                                                                                                                                                                                          | NA - yeast                                                                         | NA - yeast                                                          | classical                                                            |
| <i>Candida parapsilosis</i>                                                                                                                                                                                      | NA - yeast                                                                         | NA - yeast                                                          | classical                                                            |
| <i>Citrobacter freundii</i> *                                                                                                                                                                                    | gram-negative                                                                      | Non-fastidious                                                      | classical                                                            |
| <i>Citrobacter koseri</i> *                                                                                                                                                                                      | gram-negative                                                                      | Non-fastidious                                                      | classical                                                            |
| <i>Corynebacterium riegelii</i>                                                                                                                                                                                  | gram-positive                                                                      | fastidious                                                          | emerging                                                             |
| <i>Enterococcus faecalis</i> *                                                                                                                                                                                   | gram-positive                                                                      | Non-fastidious                                                      | classical                                                            |
| <i>Enterococcus faecium</i>                                                                                                                                                                                      | gram-positive                                                                      | Non-fastidious**                                                    | classical                                                            |
| <i>Escherichia coli</i> *                                                                                                                                                                                        | gram-negative                                                                      | Non-fastidious                                                      | classical                                                            |
| <i>Gardnerella vaginalis</i>                                                                                                                                                                                     | gram-positive                                                                      | fastidious                                                          | emerging                                                             |
| <i>Klebsiella oxytoca</i> *                                                                                                                                                                                      | gram-negative                                                                      | Non-fastidious                                                      | classical                                                            |
| <i>Klebsiella pneumoniae</i> *                                                                                                                                                                                   | gram-negative                                                                      | Non-fastidious                                                      | classical                                                            |
| <i>Morganella morganii</i> *                                                                                                                                                                                     | gram-negative                                                                      | Non-fastidious                                                      | classical                                                            |
| <i>Mycoplasma hominis</i>                                                                                                                                                                                        | NA - no cell wall                                                                  | fastidious                                                          | emerging                                                             |
| <i>Pantoea agglomerans</i> *                                                                                                                                                                                     | gram-negative                                                                      | Non-fastidious**                                                    | emerging                                                             |
| <i>Proteus mirabilis</i> *                                                                                                                                                                                       | gram-negative                                                                      | Non-fastidious                                                      | classical                                                            |
| <i>Providencia stuartii</i> *                                                                                                                                                                                    | gram-negative                                                                      | Non-fastidious                                                      | classical                                                            |
| <i>Pseudomonas</i>                                                                                                                                                                                               | gram-negative                                                                      | Non-fastidious                                                      | classical                                                            |
| <i>Serratia marcescens</i> *                                                                                                                                                                                     | gram-negative                                                                      | Non-fastidious                                                      | classical                                                            |
| <i>Staphylococcus aureus</i> *                                                                                                                                                                                   | gram-positive                                                                      | Non-fastidious                                                      | classical                                                            |
| <i>Streptococcus</i>                                                                                                                                                                                             | gram-positive                                                                      | Non-fastidious                                                      | classical                                                            |
| <i>Ureaplasma urealyticum</i>                                                                                                                                                                                    | NA - No cell wall                                                                  | fastidious                                                          | emerging                                                             |
| <b>Coagulase-negative Staphylococci (CoNS)*</b><br>[ <i>Staphylococcus epidermidis</i> ,<br><i>Staphylococcus haemolyticus</i> ,<br><i>Staphylococcus lugdunensis</i> ,<br><i>Staphylococcus saprophyticus</i> ] | gram-positive                                                                      | Non-fastidious                                                      | emerging                                                             |
| <b>Viridans group Streptococci (VGS)</b>                                                                                                                                                                         | gram-positive                                                                      | Non-fastidious                                                      | emerging                                                             |

| Microorganism                                                                                                                                 | Bacterial Cell Wall<br>(gram-negative <sup>a</sup> or gram-positive <sup>a</sup> ) | Growth<br>(fastidious <sup>b</sup> or non-fastidious <sup>b</sup> ) | Classification<br>(classical <sup>c</sup> or emerging <sup>c</sup> ) |
|-----------------------------------------------------------------------------------------------------------------------------------------------|------------------------------------------------------------------------------------|---------------------------------------------------------------------|----------------------------------------------------------------------|
| [ <i>Streptococcus anginosus</i> , <i>Streptococcus oralis</i> , <i>Streptococcus pasteurianus</i> ]                                          |                                                                                    |                                                                     |                                                                      |
| <i>Enterobacter</i> group*<br>[ <i>Klebsiella aerogenes</i> (formally known as <i>Enterobacter aerogenes</i> ), <i>Enterobacter cloacae</i> ] | gram-negative                                                                      | Non-fastidious                                                      | classical                                                            |

\*When detected, will be followed up with P-AST

\*\*Not included in P-AST

#References for the role of each organisms as pathogens available upon request

<sup>a</sup>gram-positive vs gram-negative: gram-positive = bacteria that give a positive result in the Gram stain test, which uses crystal violet dye to categorize organisms based on the thickness of the peptidoglycan layer of the cell wall; gram-negative = bacteria that give a negative result in the Gram stain test

<sup>b</sup>fastidious vs non-fastidious: fastidious = microorganism that has complex or particular nutritional requirements; non-fastidious = microorganism with simple growth requirements met by standard urine culture conditions; non-fastidious = microorganism with simple growth requirements met by standard urine culture conditions

<sup>c</sup>classical vs emerging: classical = pathogens traditionally associated with UTI; emerging = microorganisms being newly recognized as potential or confirmed uropathogens

Supplemental Table S4. Microorganisms Targeted by Probes and Primers for the M-PCR Assay

| Gene symbol    | ThermoFisher (TF)<br>Assay ID | Gene Name                                                                                    | CARD Link                                                                                     | Drug Class(es)                         | Resistance<br>Mechanism                       |
|----------------|-------------------------------|----------------------------------------------------------------------------------------------|-----------------------------------------------------------------------------------------------|----------------------------------------|-----------------------------------------------|
| <i>TEM</i>     | Pa04646128_s1                 | subclass B1 metallo- $\beta$ -<br>lactamase IMP<br>(blaIMP)                                  | <a href="https://card.mcmaster.ca/ontology/36023">https://card.mcmaster.ca/ontology/36023</a> | Cephalosporin<br>Penam<br><u>Penem</u> | Antibiotic<br>Inactivation <sup>a</sup>       |
| <i>mecA</i>    | Ba04230908_s1                 | PBP2a family $\beta$ -<br>lactam-resistant<br>peptidoglycan<br>transpeptidase MecA<br>(mecA) | <a href="https://card.mcmaster.ca/ontology/36911">https://card.mcmaster.ca/ontology/36911</a> | Penicillin                             | Antibiotic Target<br>Replacement <sup>b</sup> |
| <i>AmpC</i>    | Ba04646117_s1                 | cephalosporin-<br>hydrolyzing class C $\beta$ -<br>lactamase (blaACT)                        | <a href="https://card.mcmaster.ca/ontology/36215">https://card.mcmaster.ca/ontology/36215</a> | $\beta$ -lactam                        | Antibiotic<br>Inactivation <sup>a</sup>       |
| <i>FOX</i>     | Ba04646126_s1                 | cephalosporin-<br>hydrolyzing class C $\beta$ -<br>lactamase FOX<br>(blaFOX)                 | <a href="https://card.mcmaster.ca/ontology/36206">https://card.mcmaster.ca/ontology/36206</a> | Cephalosporin<br>Cephamycin            | Antibiotic<br>Inactivation <sup>a</sup>       |
| <i>ACC</i>     | Ba04646144_s1                 | cephalosporin-<br>hydrolyzing class C<br>beta-lactamase ACC<br>(blaACC)                      | <a href="https://card.mcmaster.ca/ontology/36212">https://card.mcmaster.ca/ontology/36212</a> | Monobactam<br>Cephalosporin<br>Penam   | Antibiotic<br>Inactivation <sup>a</sup>       |
| <i>DHA</i>     | Ba04646120_s1                 | class C $\beta$ -lactamase<br>DHA (blaDHA)                                                   | <a href="https://card.mcmaster.ca/ontology/36207">https://card.mcmaster.ca/ontology/36207</a> | Cephalosporin<br>Cephamycin            | Antibiotic<br>Inactivation <sup>a</sup>       |
| <i>MOX/CMY</i> | Ba04646156_s1                 | CMY-1/MOX family<br>class C $\beta$ -lactamase<br>CMY(blaMOX)                                | <a href="https://card.mcmaster.ca/ontology/36226">https://card.mcmaster.ca/ontology/36226</a> | $\beta$ -lactam                        | Antibiotic<br>Inactivation <sup>a</sup>       |

|             |               |                                                                                            |                                                                                                                                                                                                |                                                          |                                         |
|-------------|---------------|--------------------------------------------------------------------------------------------|------------------------------------------------------------------------------------------------------------------------------------------------------------------------------------------------|----------------------------------------------------------|-----------------------------------------|
| BIL/LAT/CMY | Ba04646135_s1 | class C $\beta$ -lactamase<br>CMY (blaCMY)                                                 | <a href="https://card.mcmaster.ca/ontology/42866">https://card.mcmaster.ca/ontology/42866</a><br><a href="https://card.mcmaster.ca/ontology/36208">https://card.mcmaster.ca/ontology/36208</a> | Cephamycin_<br>Cephalosporin                             | Antibiotic<br>Inactivation <sup>a</sup> |
| IMP-1 group | Ba04646131_s1 | subclass B1 metallo- $\beta$ -<br>lactamase IMP<br>(blaIMP)                                | <a href="https://card.mcmaster.ca/ontology/36029">https://card.mcmaster.ca/ontology/36029</a>                                                                                                  | Carbapenem<br>Cephalosporin<br>Cephamycin Penam<br>Penem | Antibiotic<br>Inactivation <sup>a</sup> |
| IMP-16      | Ba04646116_s1 | subclass B1 metallo- $\beta$ -<br>lactamase IMP<br>(blaIMP)                                | <a href="https://card.mcmaster.ca/ontology/38607">https://card.mcmaster.ca/ontology/38607</a>                                                                                                  | Cephamycin<br>Cephalosporin<br>Penam<br>Carbapenem Penem | Antibiotic<br>Inactivation <sup>a</sup> |
| IMP-7       | Ba04646158_s1 | subclass B1 metallo- $\beta$ -<br>lactamase<br>IMP(blaIMP)                                 | <a href="https://card.mcmaster.ca/ontology/38598">https://card.mcmaster.ca/ontology/38598</a>                                                                                                  | Penem<br>Penam Cephamycin<br>Cephalosporin<br>Carbapenem | Antibiotic<br>Inactivation <sup>a</sup> |
| OXA-23      | Ba04646139_s1 | OXA-23 family<br>carbapenem-<br>hydrolyzing class D $\beta$ -<br>lactamase OXA<br>(blaOXA) | <a href="https://card.mcmaster.ca/ontology/37818">https://card.mcmaster.ca/ontology/37818</a>                                                                                                  | Penem<br>Penam Cephamycin<br>Cephalosporin<br>Carbapenem | Antibiotic<br>Inactivation <sup>a</sup> |
| OXA-72      | Ba04646118_s1 | OXA-24 family<br>carbapenem-<br>hydrolyzing class D $\beta$ -<br>lactamase (blaOXA)        | <a href="https://card.mcmaster.ca/ontology/38105">https://card.mcmaster.ca/ontology/38105</a>                                                                                                  | Cephalosporin<br>Carbapenem<br>Penam                     | Antibiotic<br>Inactivation <sup>a</sup> |
| OXA-40      | Ba04646143_s1 | OXA-51 family<br>carbapenem-                                                               | <a href="https://card.mcmaster.ca/ontology/37819">https://card.mcmaster.ca/ontology/37819</a>                                                                                                  | Cephalosporin<br>Carbapenem<br>Penam                     | Antibiotic<br>Inactivation <sup>a</sup> |



|                         |               |                                                                      |                                                                                               |                                                           |                                         |
|-------------------------|---------------|----------------------------------------------------------------------|-----------------------------------------------------------------------------------------------|-----------------------------------------------------------|-----------------------------------------|
|                         |               | hydrolyzing class D $\beta$ -lactamase (blaOXA)                      |                                                                                               | Monobactam                                                |                                         |
| <i>blaOXA-48</i>        | Ba04930816_s1 | OXA-48 family class D $\beta$ -lactamase OXA (blaOXA)                | <a href="https://card.mcmaster.ca/ontology/38182">https://card.mcmaster.ca/ontology/38182</a> | Carbapenem<br>Penam<br>Cephalosporin                      | Antibiotic<br>Inactivation <sup>a</sup> |
| <i>VIM</i>              | Ba04646155_s1 | subclass B1 metallo- $\beta$ -lactamase<br>VIM(blaVIM)               | <a href="https://card.mcmaster.ca/ontology/36030">https://card.mcmaster.ca/ontology/36030</a> | Penem<br>Penam Cepharmycin<br>Cephalosporin<br>Carbapenem | Antibiotic<br>Inactivation              |
| <i>KPC</i>              | Ba04646152_s1 | carbapenem-<br>hydrolyzing class A $\beta$ -lactamase<br>KPC(blaKPC) | <a href="https://card.mcmaster.ca/ontology/36198">https://card.mcmaster.ca/ontology/36198</a> | Cephalosporin<br>Carbapenem<br>Penam<br>Monobactam        | Antibiotic<br>Inactivation <sup>a</sup> |
| <i>CTX-M</i> group 1    | Ba04646149_s1 | class A extended-<br>spectrum $\beta$ -lactamase<br>CTX-M (blaCTX-M) | <a href="https://card.mcmaster.ca/ontology/36025">https://card.mcmaster.ca/ontology/36025</a> | Cephalosporin                                             | Antibiotic<br>Inactivation <sup>a</sup> |
| <i>CTX-M</i> group 2    | Ba04646142_s1 | class A extended-<br>spectrum $\beta$ -lactamase<br>CTX-M(blaCTX-M)  | <a href="https://card.mcmaster.ca/ontology/36025">https://card.mcmaster.ca/ontology/36025</a> | Cephalosporin                                             | Antibiotic<br>Inactivation <sup>a</sup> |
| <i>CTX-M</i> group 9    | Ba04646127_s1 | class A extended-<br>spectrum $\beta$ -lactamase<br>CTX-M (blaCTX-M) | <a href="https://card.mcmaster.ca/ontology/36025">https://card.mcmaster.ca/ontology/36025</a> | Cephalosporin                                             | Antibiotic<br>Inactivation <sup>a</sup> |
| <i>CTX-M</i> group 8/25 | Ba04646154_s1 | class A extended-<br>spectrum $\beta$ -lactamase<br>CTX-M (blaCTX-M) | <a href="https://card.mcmaster.ca/ontology/36025">https://card.mcmaster.ca/ontology/36025</a> | Cephalosporin                                             | Antibiotic<br>Inactivation <sup>a</sup> |

|              |               |                                                                  |                                                                                               |                                                             |                                         |
|--------------|---------------|------------------------------------------------------------------|-----------------------------------------------------------------------------------------------|-------------------------------------------------------------|-----------------------------------------|
| <i>OXA-1</i> | Pa04646133_s1 | OXA-1 family class D $\beta$ -lactamase (blaOXA)                 | <a href="https://card.mcmaster.ca/ontology/37796">https://card.mcmaster.ca/ontology/37796</a> | Carbapenem<br>Penam<br>Cephalosporin                        | Antibiotic<br>Inactivation <sup>a</sup> |
| <i>GES</i>   | Ba04646151_s1 | class A $\beta$ -lactamase<br>GES(blaGES)                        | <a href="https://card.mcmaster.ca/ontology/36205">https://card.mcmaster.ca/ontology/36205</a> | Carbapenem<br>Penam<br>Cephalosporin                        | Antibiotic<br>Inactivation <sup>a</sup> |
| <i>PER-1</i> | Pa04646140_s1 | class A extended-<br>spectrum $\beta$ -lactamase<br>PER(blaPER)  | <a href="https://card.mcmaster.ca/ontology/38763">https://card.mcmaster.ca/ontology/38763</a> | Cephalosporin<br>Carbapenem<br>Penam<br>Monobactam<br>Penem | Antibiotic<br>Inactivation <sup>a</sup> |
| <i>PER-2</i> | Pa04646157_s1 | class A extended-<br>spectrum $\beta$ -lactamase<br>PER (blaPER) | <a href="https://card.mcmaster.ca/ontology/44597">https://card.mcmaster.ca/ontology/44597</a> | Cephalosporin<br>Carbapenem<br>Penam<br>Monobactam<br>Penem | Antibiotic<br>Inactivation <sup>a</sup> |
| <i>SHV</i>   | Ba04646134_s1 | class A $\beta$ -lactamase<br>SHV (blaSHV)                       | <a href="https://card.mcmaster.ca/ontology/36024">https://card.mcmaster.ca/ontology/36024</a> | Cephalosporin<br>Carbapenem<br>Penam                        | Antibiotic<br>Inactivation <sup>a</sup> |
| <i>VEB</i>   | Ba04646153_s1 | class A extended-<br>spectrum $\beta$ -lactamase<br>(blaVEB)     | <a href="https://card.mcmaster.ca/ontology/36182">https://card.mcmaster.ca/ontology/36182</a> | Cephalosporin<br>Monobactam                                 | Antibiotic<br>Inactivation <sup>a</sup> |

|              |               |                                                               |                                                                                               |                 |                                           |
|--------------|---------------|---------------------------------------------------------------|-----------------------------------------------------------------------------------------------|-----------------|-------------------------------------------|
| <i>QnrA</i>  | Ba04646160_s1 | quinolone resistance pentapeptide repeat protein QnrA2 (qnrA) | <a href="https://card.mcmaster.ca/ontology/39142">https://card.mcmaster.ca/ontology/39142</a> | Fluoroquinolone | Antibiotic Target Protection <sup>c</sup> |
| <i>QnrS</i>  | Ba04646145_s1 | quinolone resistance pentapeptide repeat protein QnrS9 (qnrS) | <a href="https://card.mcmaster.ca/ontology/39224">https://card.mcmaster.ca/ontology/39224</a> | Fluoroquinolone | Antibiotic Target Protection <sup>c</sup> |
| <i>VanA1</i> | Ba04646159_s1 | D-alanine--(R)-lactate ligase VanA (vanA)                     | <a href="https://card.mcmaster.ca/ontology/36019">https://card.mcmaster.ca/ontology/36019</a> | Glycopeptide    | Antibiotic Target Alteration <sup>d</sup> |
| <i>VanA2</i> | Ba04646147_s1 | D-alanine--(R)-lactate ligase VanA (vanA)                     | <a href="https://card.mcmaster.ca/ontology/36019">https://card.mcmaster.ca/ontology/36019</a> | Glycopeptide    | Antibiotic Target Alteration <sup>d</sup> |
| <i>VanB</i>  | Pa04646150_s1 | D-alanine--(R)-lactate ligase VanB (vanB)                     | <a href="https://card.mcmaster.ca/ontology/36022">https://card.mcmaster.ca/ontology/36022</a> | Glycopeptide    | Antibiotic Target Alteration <sup>d</sup> |

<sup>#</sup>References available upon request

<sup>a</sup>Antibiotic Inactivation - Chemically altering the antibiotic (Ex: via hydrolysis of the chemically reactive  $\beta$ -lactam ring)

<sup>b</sup>Antibiotic Target Replacement - Replacement or substitution of antibiotic action target

<sup>c</sup>Antibiotic Target Protection - Protection of antibiotic action target from antibiotic binding

<sup>d</sup>Antibiotic Target Alteration - Mutational alteration or enzymatic modification of antibiotic target

Supplemental Table S5. Antibiotic Resistance Genes Targeted by Probes and Primers for the M-PCR Assay

| Antibiotic Name               | Drug Class                                                                                          |
|-------------------------------|-----------------------------------------------------------------------------------------------------|
| Ampicillin                    | Aminopenicillin                                                                                     |
| Ampicillin/Sulbactam          | Aminopenicillin - $\beta$ -lactamase Inhibitor Combination                                          |
| Amoxicillin/Clavulanate       | Aminopenicillin - $\beta$ -lactamase Inhibitor Combination                                          |
| Cefazolin                     | Cephalosporin                                                                                       |
| Cefaclor                      | Cephalosporin                                                                                       |
| Cefepime                      | Cephalosporin                                                                                       |
| Cefoxitin                     | Cephalosporin                                                                                       |
| Ceftazidime                   | Cephalosporin                                                                                       |
| Ceftriaxone                   | Cephalosporin                                                                                       |
| Ciprofloxacin                 | Fluoroquinolone                                                                                     |
| Fosfomycin                    | A member of a novel class of Phosphonic antibiotics                                                 |
| Gentamicin                    | Aminoglycoside                                                                                      |
| Levofloxacin                  | Fluoroquinolone                                                                                     |
| Meropenem                     | $\beta$ -lactam                                                                                     |
| Nitrofurantoin                | Nitrofurantoin Derivative                                                                           |
| Piperacillin/Tazobactam       | $\beta$ -lactam antibiotic of the ureidopenicillin class - $\beta$ -lactamase Inhibitor Combination |
| Trimethoprim/Sulfamethoxazole | Antibacterial Folate Antagonist - Other Combination                                                 |
| Tetracycline                  | Tetracycline antibiotic family                                                                      |
| Vancomycin                    | Glycopeptide                                                                                        |

#References for the role of each organisms as pathogens available upon request

Supplemental Table S6. Antibiotics Tested in the P-AST Assay

|                              | All (N = 577)           |                              |         | $\geq 60$ (n = 416)     |                              |         |
|------------------------------|-------------------------|------------------------------|---------|-------------------------|------------------------------|---------|
|                              | SUC<br>(n = 148)        | M-PCR/<br>P-AST<br>(n = 429) | p-value | SUC<br>(n = 91)         | M-PCR/<br>P-AST<br>(n = 325) | p-value |
| Age                          |                         |                              | 0.008   |                         |                              | 0.56    |
| Mean<br>(SD)                 | 62.7<br>(14.9)          | 66.4 (14.4)                  |         | 72.3<br>(7.6)           | 72.8 (7.4)                   |         |
| Median<br>(Min, Max)         | 64.8<br>(20.6,<br>96.0) | 69.4<br>(18.9,<br>95.5)      |         | 72.2<br>(60.3,<br>96.0) | 72.1<br>(60.2,<br>95.5)      |         |
| Sex                          |                         |                              | 0.11    |                         |                              | 0.07    |
| Male                         | 44<br>(29.7%)           | 163<br>(38.0%)               |         | 29<br>(31.9%)           | 138<br>(42.5%)               |         |
| Female                       | 104<br>(70.3%)          | 266<br>(62.0%)               |         | 62<br>(68.1%)           | 187<br>(57.5%)               |         |
| Baseline<br>Symptom<br>Score | 5.0 (2.6)               | 4.7 (2.4)                    | 0.13    | 5.4 (2.6)               | 4.6 (2.4)                    | 0.006   |

Supplemental Table S7. Demographics of the Unmatched Study Cohort

|                                                                       | <u>M-PCR/P-AST</u> | <u>SUC</u>  |                 |
|-----------------------------------------------------------------------|--------------------|-------------|-----------------|
|                                                                       | Mean (SD)          |             | <i>p</i> -value |
| Full sample ( <i>n</i> = 423 M-PCR/P-AST; <i>n</i> = 133 SUC)         | 1.43 (0.53)        | 2.89 (1.15) | <0.0001         |
| Sample of age 60+<br>( <i>n</i> = 320 M-PCR/P-AST; <i>n</i> = 81 SUC) | 1.45 (0.54)        | 2.94 (1.13) | <0.0001         |

Supplemental Table S8. Comparison of Turnaround Times between M-PCR/P-AST and SUC

|                                                                       | <u>M-PCR/P-AST</u> | <u>SUC</u>  |                 |
|-----------------------------------------------------------------------|--------------------|-------------|-----------------|
|                                                                       | Mean (SD)          |             | <i>p</i> -value |
| Full sample ( <i>n</i> = 329 M-PCR/P-AST; <i>n</i> = 55 SUC)          | 1.51 (0.55)        | 3.53 (1.14) | <0.0001         |
| Sample of age 60+<br>( <i>n</i> = 253 M-PCR/P-AST; <i>n</i> = 43 SUC) | 1.51 (0.55)        | 3.50 (1.10) | <0.0001         |

Supplemental Table S9. Comparison of Turnaround Times between M-PCR/P-AST and SUC for All Matched Subjects with Positive Results

|                                     | Overall                    |                                    |                                                    |
|-------------------------------------|----------------------------|------------------------------------|----------------------------------------------------|
|                                     | SUC<br><i>n</i> /total (%) | M-PCR/P-AST<br><i>n</i> /total (%) | <i>p</i> -value<br>(SUC<br>vs.<br>M-PCR/<br>P-AST) |
| Recurrence of UTI symptoms          | 32/148<br>(21.6%)          | 69/429 (16.1%)                     | 0.13327                                            |
| Medical Provider Visit (for UTI)    | 49/148<br>(33.1%)          | 93/429 (21.7%)                     | 0.00769                                            |
| Hospital, ER, or UC Visit (for UTI) | 22/148<br>(14.9%)          | 34/429 (7.9%)                      | 0.02299                                            |
| All Negative Outcomes               | 67/148<br>(45.3%)          | 139/429 (32.4%)                    | 0.0054                                             |

Supplemental Table S10. Comparison of Negative Outcomes for All Unmatched Subjects

|                                     | ≥ 60 Years of Age          |                                    |                                                    |
|-------------------------------------|----------------------------|------------------------------------|----------------------------------------------------|
|                                     | SUC<br><i>n</i> /total (%) | M-PCR/P-AST<br><i>n</i> /total (%) | <i>p</i> -value<br>(SUC<br>vs.<br>M-PCR/<br>P-AST) |
| Recurrence of UTI symptoms          | 22/91<br>(24.2%)           | 48/325 (14.8%)                     | 0.03968                                            |
| Medical Provider Visit (for UTI)    | 29/91<br>(31.9%)           | 69/325 (21.2%)                     | 0.04962                                            |
| Hospital, ER, or UC Visit (for UTI) | 17/91<br>(18.7%)           | 20/325 (6.2%)                      | 0.00061                                            |
| All Negative Outcomes               | 42/91<br>(46.2%)           | 98/325 (30.2%)                     | 0.00564                                            |

Supplemental Table S11. Comparison of Negative Outcomes for Unmatched Subjects ≥ 60 Years of Age

| Total<br>( <i>N</i> = 577)                               | SUC Arm<br>( <i>n</i> = 148) | M-PCR/P-AST Arm<br>( <i>n</i> = 429) | <i>p</i> -value |
|----------------------------------------------------------|------------------------------|--------------------------------------|-----------------|
| Not Treated with Antimicrobial Agents<br>( <i>n</i> , %) | 49, 33.1%                    | 132, 30.8%                           | 0.6             |
| Treated with Antimicrobial Agents<br>( <i>n</i> , %)     | 99, 66.9%                    | 297, 69.2%                           |                 |
| Empirical Treatment ( <i>n</i> , %)                      | 66, 66.7%                    | 84, 28.3%                            | <0.0001         |
| Directed Treatment ( <i>n</i> , %)                       | 33, 33.3%                    | 127, 71.4%                           |                 |

Supplemental Table S12. Comparisons of percentages of patients empirically or directedly treated with antimicrobial agents among the unmatched subjects in the SUC and M-PCR/P-AST arms

| Total<br>( <i>n</i> = 416)                               | SUC Arm<br>( <i>n</i> = 91) | M-PCR/P-AST Arm<br>( <i>n</i> = 325) | <i>p</i> -value |
|----------------------------------------------------------|-----------------------------|--------------------------------------|-----------------|
| Not Treated with Antimicrobial Agents<br>( <i>n</i> , %) | 22, 24.2%                   | 99, 30.5%                            | 0.24            |
| Treated with Antimicrobial Agents<br>( <i>n</i> , %)     | 69, 75.8%                   | 226, 69.5%                           |                 |
| Empirical Treatment ( <i>n</i> , %)                      | 48, 69.6%                   | 67, 29.7%                            | < 0.0001        |
| Directed Treatment ( <i>n</i> , %)                       | 21, 30.4%                   | 159, 70.4%                           |                 |

Supplemental Table S13. Comparisons of percentages of patients empirically or directedly treated with antimicrobial agents among the unmatched subjects  $\geq 60$  in the SUC and M-PCR/P-AST arms
